# Supplementary material for: Fast fabrication of SnTe via a non-equilibrium method and enhanced thermoelectric properties by medium-entropy engineering
Source: Royal Society of Chemistry journal article supplement (doi:10.1039/d3tc00077j), 2023-01-01
Supplement: d3tc00077j1.pdf [file d3tc00077j1.pdf]

## Supporting Information

### Fast Fabrication of SnTe via Non-Equilibrium Method and Enhanced Thermoelectric Properties by Medium-Entropy Engineering

Haojian Su<sup>1,2</sup>, Yemao Han<sup>1</sup>, Liancheng Xie<sup>1,2</sup>, Mingyue Jiang<sup>1,2</sup>, Zekun Wang<sup>1,2</sup>, Zhicong Miao<sup>1,2</sup>, Guoqiang Liu<sup>3</sup>, Min Zhou<sup>1\*</sup>, Rongjin Huang<sup>1,2\*</sup> and Laifeng Li<sup>1</sup>

<sup>1</sup>CAS Key Laboratory of Cryogenics, Technical Institute of Physics and Chemistry, Beijing 100190, China

<sup>2</sup>Centre of Materials Science and Optoelectronics Engineering, University of Chinese Academy of Sciences, Beijing 100049, China

<sup>3</sup>Ningbo Institute of Materials Technology and Engineering, Chinese Academy of Sciences, Ningbo 315201, China

\*Corresponding author: mzhou@mail.ipc.ac.cn, huangrongjin@mail.ipc.ac.cn

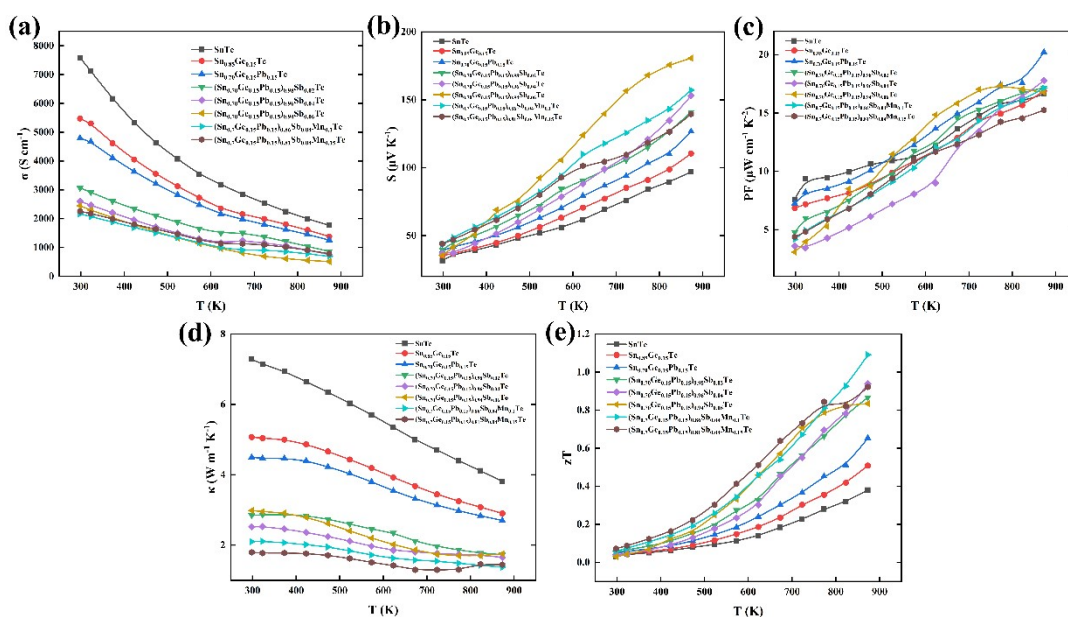

Figure S1. Temperature dependent (a) electrical conductivity, (b) Seebeck coefficient, (c) power factor, (d) thermal conductivity, and (e) zT value.
